# Supplementary material
Source: PubMed Central journal article supplement (PMC2757945)
Supplement: NIHMS77489-supplement-Supplementary_data.pdf [file NIHMS77489-supplement-Supplementary_data.pdf]

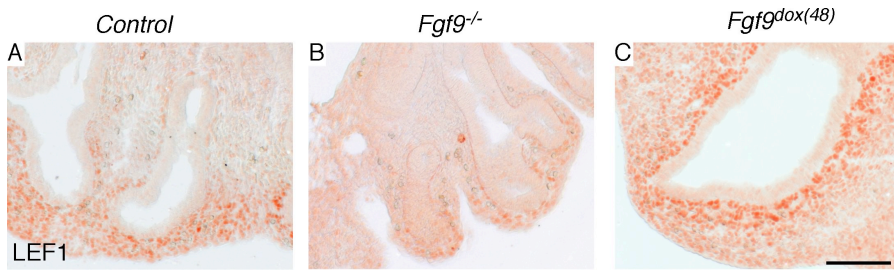

**Supplemental Figure 1. *Fgf9* regulates LEF1 expression.** (A-C) Immunohistochemical detection of LEF1 in control (A), *Fgf9*<sup>-/-</sup> (B) and *Fgf9*<sup>dox(48)</sup> (C) lungs showing decreased expression of LEF1 in *Fgf9*<sup>-/-</sup> lung mesenchyme (B) and increased expression in FGF9 overexpressing mesenchyme (C). Scale bar: C, 50µm.

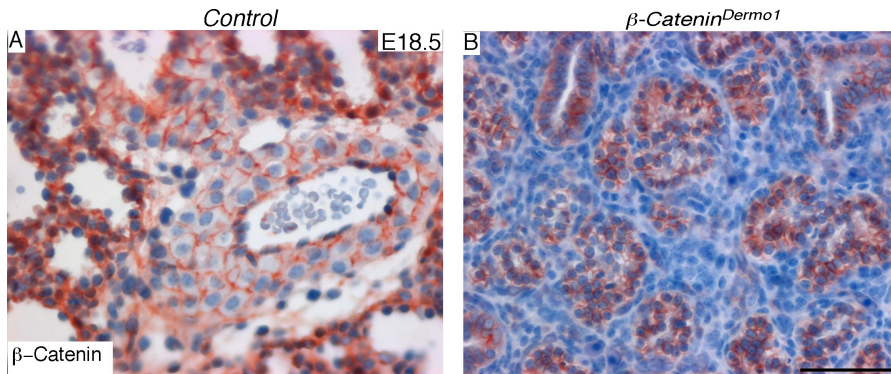

**Supplemental Figure 2.  $\beta$ -Catenin expression in E18.5 lung mesenchyme in  $\beta$ -Catenin<sup>Dermol</sup> embryos.** Immunostaining of an E18.5 lung showing  $\beta$ -Catenin expression in epithelium and mesenchyme in control lungs (A) and loss of mesenchymal expression in  $\beta$ -Catenin<sup>Dermol</sup> lungs (B). Scale bar: B, 50µm.

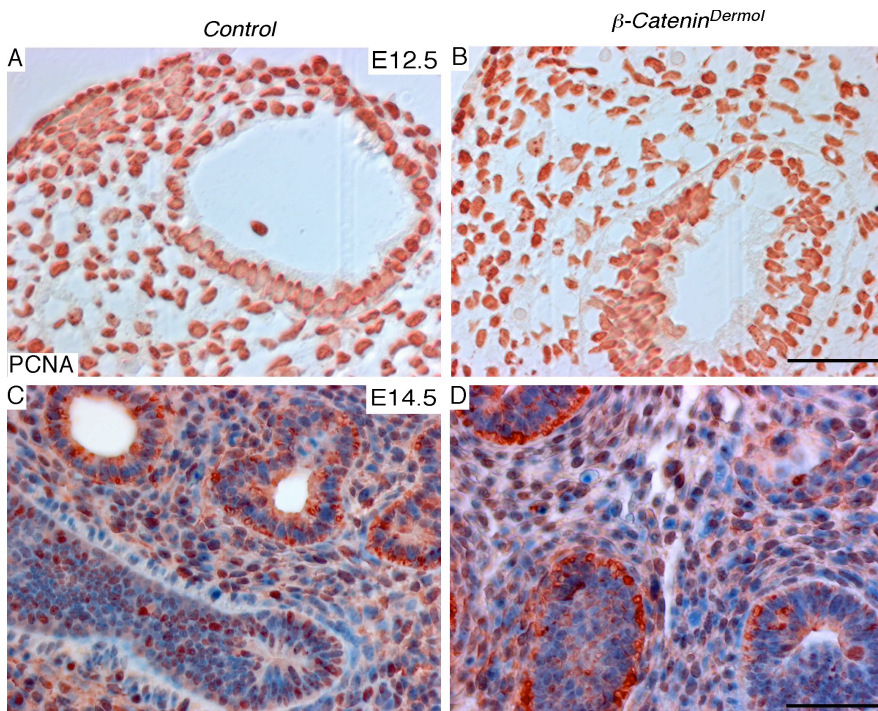

**Supplemental Figure 3.  $\beta$ -Catenin does not affect PCNA expression in lung mesenchyme.** Immunostaining of an E12.5 lung showing no difference in PCNA expression in mesenchyme or epithelium in control lungs (A) and  $\beta$ -Catenin<sup>Dermol</sup> lungs (B). At E14.5, PCNA expression was similar in control (C) and  $\beta$ -Catenin<sup>Dermol</sup> lungs (D). Scale bars: B, D, 50µm.
